# Supplementary material for: Designing asymmetric Dy2 single-molecule magnets with two-step relaxation processes by the modification of the coordination environments of Dy(iii) ions
Source: Royal Society of Chemistry journal article supplement (doi:10.1039/d0dt01619e), 2020-01-01
Supplement: d0dt01619e1.pdf [file d0dt01619e1.pdf]

## *Supporting Information*

# **Designing asymmetric Dy<sub>2</sub> single-molecule magnets with two-step relaxation processes by the modification of the coordination environments of Dy(III) ions**

Yuan Huang,<sup>a</sup> Jia-Xin Li,<sup>b</sup> Yu Ge,<sup>a</sup> Xia-Mei Zhang,<sup>a</sup> Yang Xu,<sup>a</sup> Yahong Li,<sup>\*a</sup> Yi-Quan Zhang,<sup>\*b</sup> and Jin-Lei Yao<sup>\*c</sup>

<sup>a</sup>*College of Chemistry, Chemical Engineering and Materials Science, Soochow*

*University, Suzhou 215123, P. R. China. E-mail: liyahong@suda.edu.cn*

<sup>b</sup>*Jiangsu Key Laboratory for NSLSCS, School of Physical Science and Technology,*

*Nanjing Normal University, Nanjing 210023, P. R. China. E-mail:*

*zhangyiquan@njnu.edu.cn*

<sup>c</sup>*Jiangsu Key Laboratory of Micro and Nano Heat Fluid Flow Technology and*

*Energy Application, School of Mathematics and Physics, Suzhou University of*

*Science and Technology, Suzhou 215009, P. R. China. E-mail: jlyao@usts.edu.cn*

## Content

|                                                                                                                                                                                                                               |    |
|-------------------------------------------------------------------------------------------------------------------------------------------------------------------------------------------------------------------------------|----|
| 1. The $^1\text{H}$ NMR spectrum (DMSO- $d_6$ ) of the $\text{H}_2\text{L}$ ligand.....                                                                                                                                       | 3  |
| 2. The IR spectra of the ligand, complex <b>1</b> and complex <b>2</b> .....                                                                                                                                                  | 4  |
| 3. The PXRD patterns of complex <b>1</b> and complex <b>2</b> .....                                                                                                                                                           | 5  |
| 4. Selected bond lengths ( $\text{\AA}$ ) and angle ( $^\circ$ ) for complex <b>1</b> .....                                                                                                                                   | 6  |
| 5. Selected bond lengths ( $\text{\AA}$ ) and angle ( $^\circ$ ) for complex <b>2</b> .....                                                                                                                                   | 7  |
| 6. SHAPE program details for <b>1</b> and <b>2</b> .....                                                                                                                                                                      | 8  |
| 7. The TGA curves of complex <b>1</b> and complex <b>2</b> .....                                                                                                                                                              | 9  |
| 8. Relaxation fitting parameters from Least-Squares Fitting of $\chi(\omega)$ data for <b>1</b> .....                                                                                                                         | 10 |
| 9. Relaxation fitting parameters from Least-Squares Fitting of $\chi(\omega)$ data for <b>2</b> .....                                                                                                                         | 11 |
| 10. Frequency dependence of the in-phase ( $\chi'$ ) and out-of-phase ( $\chi''$ ) magnetic susceptibilities for complex <b>1</b> in the range of 8 to 24 K and <b>2</b> in the range of 5 to 20 K under zero $dc$ field...12 |    |
| 11. $\ln\tau$ vs. $T^{-1}$ plot for <b>1</b> and <b>2</b> for two relaxation processes .....                                                                                                                                  | 13 |
| 12. Some examples of asymmetric $\text{Dy}_2$ SMMs possessing two-step relaxation processes.....                                                                                                                              | 14 |
| 13. Computational details .....                                                                                                                                                                                               | 15 |

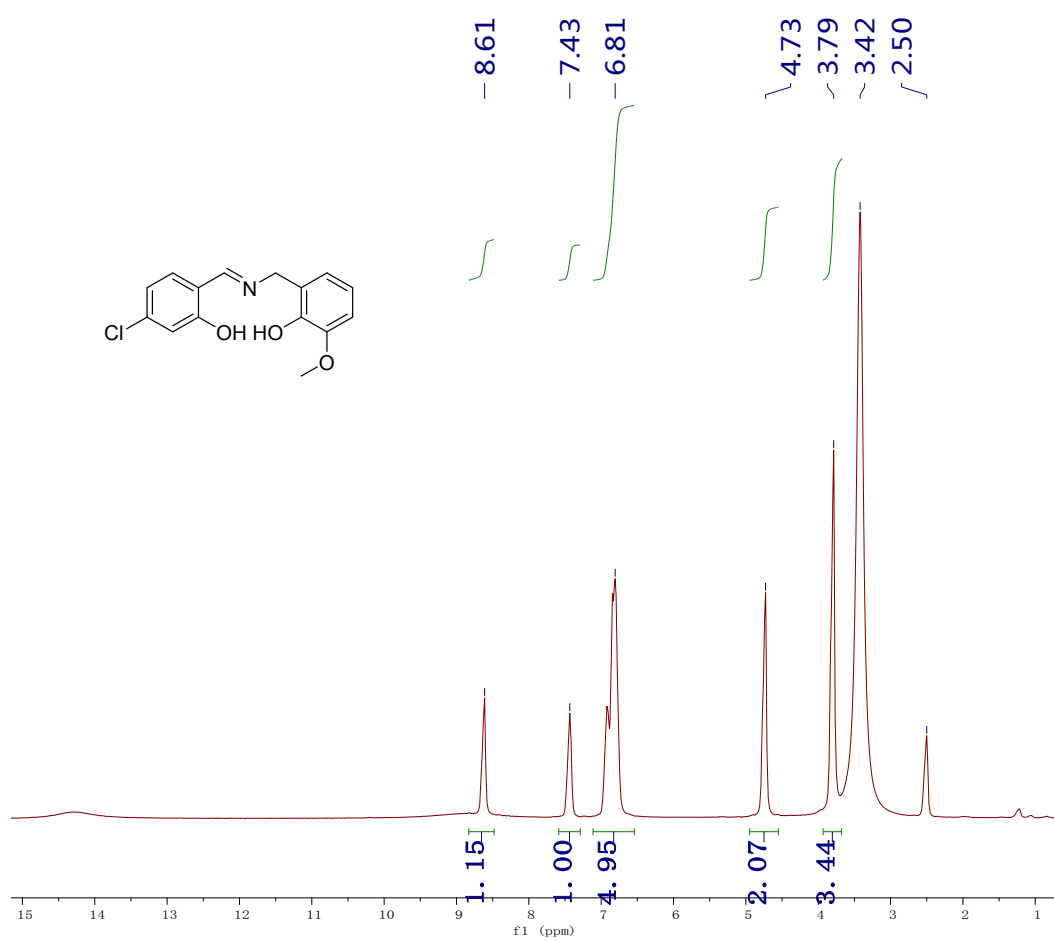

**Fig. S1** The <sup>1</sup>H NMR spectrum (DMSO-*d*<sub>6</sub>) of the H<sub>2</sub>L ligand.

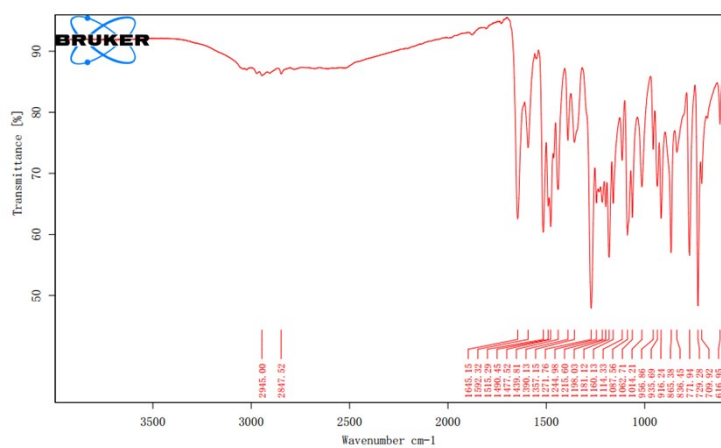

(a)

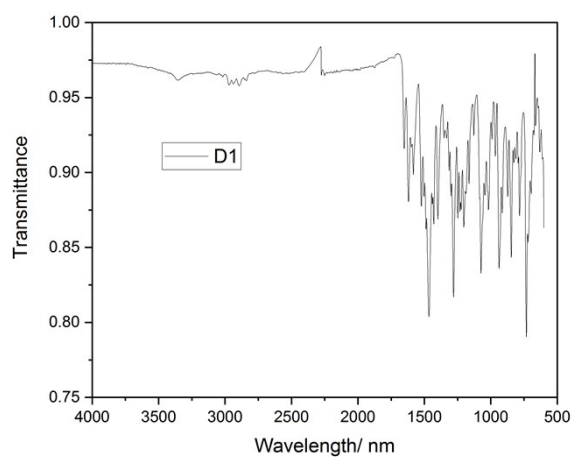

(b)

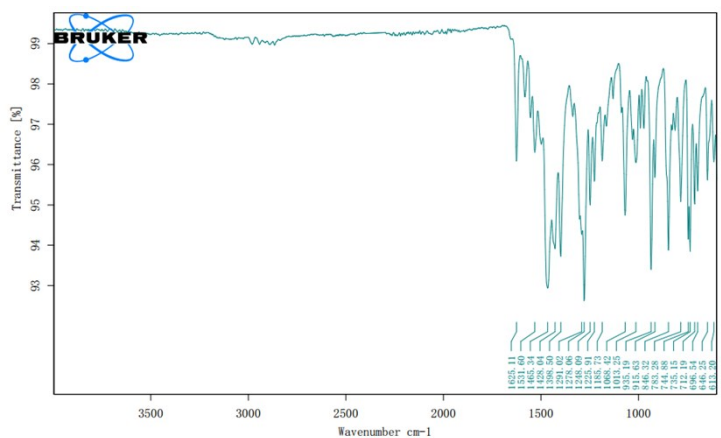

(c)

**Fig. S2** The IR spectra of the (a) ligand, (b) complex 1 and (c) complex 2.

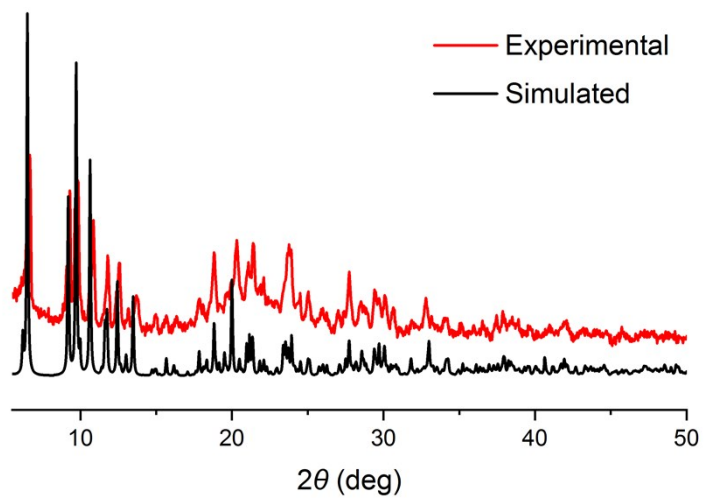

(a)

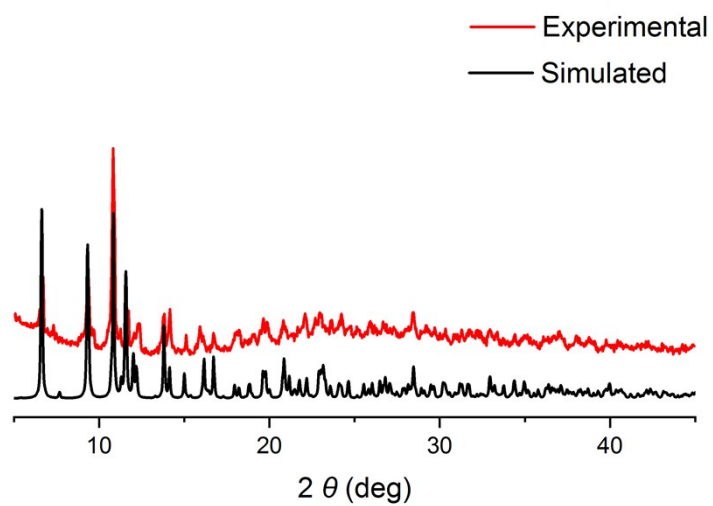

(b)

**Fig. S3** The PXR D patterns of (a) complex 1 and (b) complex 2.

**Table S1** Selected bond lengths (Å) and angle (°) for complex **1**

| Bond length (Å) |           | Bond angle (°) |           |             |            |             |            |
|-----------------|-----------|----------------|-----------|-------------|------------|-------------|------------|
| Dy1-Dy2         | 3.7830(3) | O1-Dy1-Dy2     | 169.00(7) | O7-Dy1-O11  | 154.97(9)  | O5-Dy2-Dy1  | 88.46(7)   |
| Dy1-O1          | 2.181(3)  | O1-Dy1-O2      | 145.06(9) | O7-Dy1-N1   | 80.50(9)   | O5-Dy2-O2   | 80.94(9)   |
| Dy1-O2          | 2.344(2)  | O1-Dy1-O3      | 144.30(9) | O9-Dy1-Dy2  | 75.11(7)   | O5-Dy2-O3   | 85.30(10)  |
| Dy1-O3          | 2.272(2)  | O1-Dy1-O7      | 92.14(10) | O9-Dy1-O10  | 72.11(9)   | O5-Dy2-O4   | 65.74(9)   |
| Dy1-O7          | 2.273(3)  | O1-Dy1-O9      | 94.13(10) | O9-Dy1-O11  | 50.75(9)   | O5-Dy2-O8   | 131.24(9)  |
| Dy1-O9          | 2.452(3)  | O1-Dy1-O10     | 78.97(9)  | O9-Dy1-N1   | 125.54(9)  | O5-Dy2-O12  | 152.66(10) |
| Dy1-O10         | 2.483(3)  | O1-Dy1-O11     | 77.07(10) | O10-Dy1-Dy2 | 99.42(6)   | O5-Dy2-N2   | 78.19(11)  |
| Dy1-O11         | 2.576(3)  | O1-Dy1-N1      | 74.84(10) | O10-Dy1-O11 | 114.89(9)  | O6-Dy2-Dy1  | 153.68(9)  |
| Dy1-N1          | 2.511(3)  | O2-Dy1-Dy2     | 36.27(6)  | O10-Dy1-N1  | 149.07(9)  | O6-Dy2-O2   | 145.61(10) |
| Dy2-O2          | 2.346(2)  | O2-Dy1-O9      | 79.45(9)  | O11-Dy1-Dy2 | 94.02(7)   | O6-Dy2-O3   | 136.53(10) |
| Dy2-O3          | 2.327(2)  | O2-Dy1-O10     | 66.33(9)  | N1-Dy1-Dy2  | 109.37(7)  | O6-Dy2-O4   | 78.04(11)  |
| Dy2-O4          | 2.500(3)  | O2-Dy1-O11     | 120.55(9) | N1-Dy1-O11  | 74.92(9)   | O6-Dy2-O5   | 117.46(11) |
| Dy2-O5          | 2.253(3)  | O2-Dy1-N1      | 136.25(9) | O2-Dy2-Dy1  | 36.23(6)   | O6-Dy2-O8   | 74.81(10)  |
| Dy2-O6          | 2.190(3)  | O3-Dy1-Dy2     | 35.14(6)  | O2-Dy2-O4   | 135.76(9)  | O6-Dy2-O12  | 78.96(11)  |
| Dy2-O8          | 2.609(3)  | O3-Dy1-O2      | 70.24(9)  | O2-Dy2-O8   | 116.32(9)  | O6-Dy2-N2   | 75.07(11)  |
| Dy2-O12         | 2.443(3)  | O3-Dy1-O7      | 102.09(9) | O2-Dy2-O12  | 74.64(10)  | O8-Dy2-Dy1  | 84.70(6)   |
| Dy2-N2          | 2.437(3)  | O3-Dy1-O9      | 87.25(9)  | O2-Dy2-N2   | 81.48(10)  | O12-Dy2-Dy1 | 79.14(7)   |
|                 |           | O3-Dy1-O10     | 134.42(9) | O3-Dy2-Dy1  | 34.19(6)   | O12-Dy2-O4  | 141.55(10) |
|                 |           | O3-Dy1-O11     | 76.41(9)  | O3-Dy2-O2   | 69.28(8)   | O12-Dy2-O8  | 72.18(10)  |
|                 |           | O3-Dy1-N1      | 75.48(9)  | O3-Dy2-O4   | 79.37(9)   | N2-Dy2-Dy1  | 117.70(8)  |
|                 |           | O7-Dy1-Dy2     | 98.54(6)  | O3-Dy2-O8   | 63.09(9)   | N2-Dy2-O4   | 116.70(11) |
|                 |           | O7-Dy1-O2      | 80.96(9)  | O3-Dy2-O12  | 97.18(10)  | N2-Dy2-O8   | 145.61(10) |
|                 |           | O7-Dy1-O9      | 153.94(9) | O3-Dy2-N2   | 148.34(10) | N2-Dy2-O12  | 86.12(12)  |
|                 |           | O7-Dy1-O10     | 84.36(10) | O4-Dy2-Dy1  | 111.57(7)  | Dy1-O2-Dy2  | 107.50(10) |
|                 |           |                |           | O4-Dy2-O8   | 72.28(9)   | Dy1-O3-Dy2  | 110.67(10) |

**Table S2** Selected bond lengths (Å) and angle (°) for complex **2**

| Bond length (Å) |          | Bond angle (°) |           |            |            |
|-----------------|----------|----------------|-----------|------------|------------|
| Dy1-O1          | 2.327(2) | O1-Dy1-O2      | 82.35(8)  | O1-Dy2-O3  | 71.11(7)   |
| Dy1-O2          | 2.466(2) | O1-Dy1-O3      | 69.78(7)  | O1-Dy2-O5  | 133.45(7)  |
| Dy1-O3          | 2.370(2) | O1-Dy1-O6      | 66.26(7)  | O1-Dy2-O7  | 81.12(8)   |
| Dy1-O6          | 2.499(2) | O1-Dy1O11      | 80.62(8)  | O1-Dy2-N1  | 76.52(8)   |
| Dy1-O8          | 2.185(2) | O1-Dy1-N2      | 142.00(8) | O3-Dy2-O5  | 67.08(7)   |
| Dy1-O9          | 2.310(2) | O2-Dy1-O6      | 118.80(8) | O3-Dy2-N1  | 139.90(8)  |
| Dy1-O11         | 2.483(2) | O2-Dy1-O11     | 51.49(8)  | O4-Dy2-O1  | 141.48(8)  |
| Dy1-N2          | 2.454(3) | O3-Dy1O2       | 81.72(8)  | O4-Dy2-O3  | 144.84(8)  |
| Dy2-O1          | 2.295(2) | O3-Dy1-O6      | 127.14(8) | O4-Dy2-O5  | 77.79(8)   |
| Dy2-O3          | 2.326(2) | O3-Dy1-O11     | 127.59(8) | O4-Dy2-O7  | 87.51(9)   |
| Dy2-O4          | 2.197(2) | O3-Dy1-N2      | 76.83(8)  | O4-Dy2-N1  | 73.97(9)   |
| Dy2-O5          | 2.484(2) | O8-Dy1-O1      | 143.28(8) | O4-Dy2-O12 | 91.56(10)  |
| Dy2-O7          | 2.311(2) | O8-Dy1-O2      | 109.44(9) | O7-Dy2-O3  | 85.92(8)   |
| Dy2-N1          | 2.479(3) | O8-Dy1-O3      | 144.63(8) | O7-Dy2-O5  | 76.49(9)   |
| Dy2-O12         | 2.239(3) | O8-Dy1-O6      | 77.94(8)  | O7-Dy2-N1  | 112.00(9)  |
|                 |          | O8-Dy1-O9      | 87.76(9)  | N1-Dy2-O5  | 149.92(8)  |
|                 |          | O8-Dy1-O11     | 80.72(9)  | O12-Dy2-O1 | 111.09(10) |
|                 |          | O8-Dy1-N2      | 74.10(8)  | O12-Dy2-O3 | 83.30(9)   |
|                 |          | O9-Dy1-O1      | 90.45(8)  | O12-Dy2-O5 | 83.66(10)  |
|                 |          | O9-Dy1-O2      | 159.48(8) | O12-Dy2-O7 | 159.87(11) |
|                 |          | O9-Dy1-O3      | 77.76(8)  | O12-Dy2-N1 | 86.95(10)  |
|                 |          | O9-Dy1-O6      | 74.77(9)  | Dy2-O1-Dy1 | 106.96(8)  |
|                 |          | O9-Dy1-O11     | 146.16(9) | C13-O1-Dy1 | 118.89(18) |
|                 |          | O9-Dy1-N2      | 99.88(9)  | C13-O1-Dy2 | 125.35(18) |
|                 |          | O11-Dy1-O6     | 71.75(8)  | N3-O2-Dy1  | 96.49(18)  |
|                 |          | N2-Dy1-O2      | 75.27(8)  | Dy2-O3-Dy1 | 104.55(8)  |
|                 |          | N2-Dy1-O6      | 151.74(8) | N3-O11-Dy1 | 96.01(18)  |
|                 |          | N2-Dy1-O11     | 107.22(9) |            |            |

## SHAPE program details for 1 and 2

**Table S3** Agreement factors between the coordination polyhedron of the Dy<sup>III</sup> ions in eight-coordinated and the various ideal polyhedral calculated by the SHAPE program

|       | SAPR-8( $D_{4d}$ ) | TDD-8( $D_{2d}$ ) |
|-------|--------------------|-------------------|
| 1_Dy1 | 3.072              | 1.825             |
| 1_Dy2 | 1.227              | 2.200             |
| 2_Dy1 | 3.073              | 2.098             |

**Table S4** Agreement factors between the coordination polyhedron of the Dy<sup>III</sup> ion in seven-coordinated and the various ideal polyhedral calculated by the SHAPE program

|       | PBPY-7( $D_{5h}$ ) | CTPR-7( $C_{2v}$ ) |
|-------|--------------------|--------------------|
| 2_Dy2 | 2.429              | 1.885              |



(a)

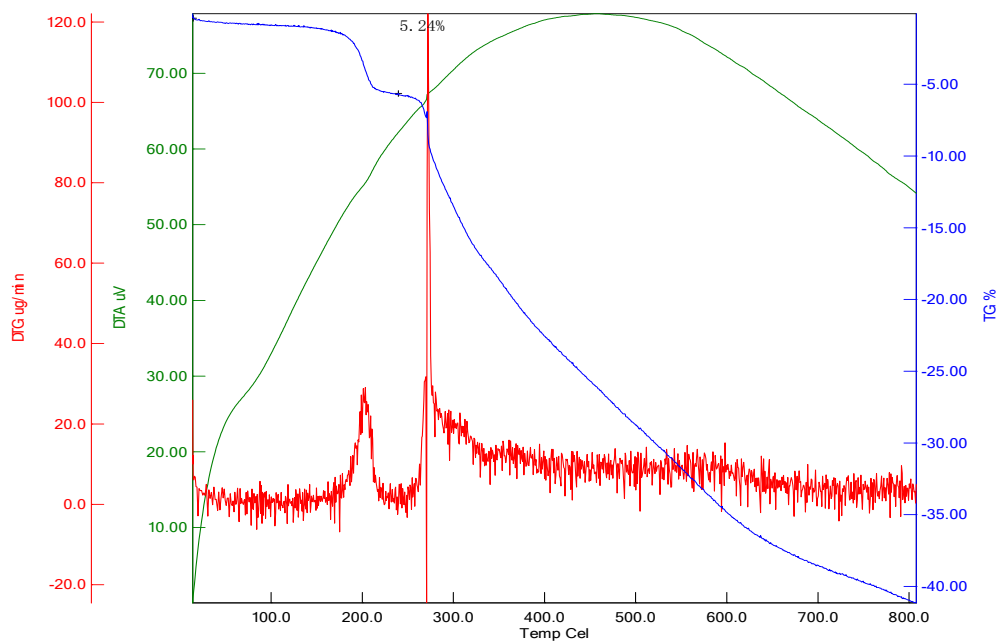

(b)

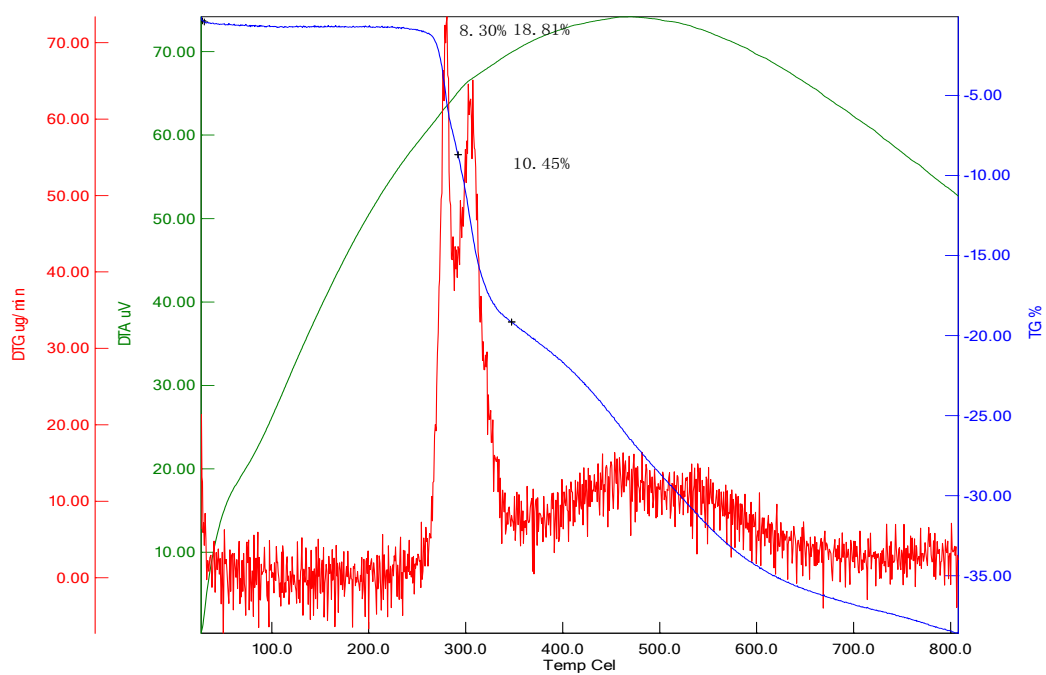

**Fig. S4** The TGA curves of (a) complex 1 and (b) complex 2.

**Table S5** Relaxation fitting parameters from Least-Squares Fitting of  $\chi(\omega)$  data for **1**

| $T$<br>(K) | $\chi_{S,tot}$<br>( $\text{cm}^3\text{mol}^{-1}$ ) | $\Delta\chi_1$<br>( $\text{cm}^3\text{mol}^{-1}$ ) | $\Delta\chi_2$<br>( $\text{cm}^3\text{mol}^{-1}$ ) | $\alpha_1$ | $\alpha_2$ | $\tau_1$<br>(s) | $\tau_2$<br>(s) |
|------------|----------------------------------------------------|----------------------------------------------------|----------------------------------------------------|------------|------------|-----------------|-----------------|
| 8          | 6.55E-05                                           | 1.29E+00                                           | 1.12E+00                                           | 1.31E-16   | 8.65E-02   | 2.81E-02        | 1.85E-03        |
| 9          | 7.35E-05                                           | 1.42E+00                                           | 1.05E+00                                           | 1.21E-16   | 7.99E-02   | 2.45E-02        | 1.05E-03        |
| 10         | 1.88E-05                                           | 1.22E+00                                           | 9.50E-01                                           | 1.50E-16   | 7.57E-02   | 1.52E-02        | 5.76E-04        |
| 11         | 3.72E-05                                           | 1.08E+00                                           | 8.69E-01                                           | 3.37E-16   | 7.51E-02   | 9.97E-03        | 3.12E-04        |
| 12         | 5.74E-05                                           | 9.84E-01                                           | 8.04E-01                                           | 1.66E-16   | 7.73E-02   | 6.82E-03        | 1.63E-04        |
| 13         | 1.61E-04                                           | 8.97E-01                                           | 7.47E-01                                           | 2.77E-18   | 7.95E-02   | 4.76E-03        | 8.30E-05        |
| 14         | 3.51E-04                                           | 8.22E-01                                           | 7.00E-01                                           | 5.17E-18   | 9.03E-02   | 3.39E-03        | 4.20E-05        |
| 15         | 5.83E-04                                           | 7.57E-01                                           | 6.59E-01                                           | 5.34E-18   | 1.19E-01   | 2.44E-03        | 2.08E-05        |
| 16         | 6.58E-04                                           | 7.01E-01                                           | 6.23E-01                                           | 9.85E-18   | 1.49E-01   | 1.77E-03        | 1.04E-05        |
| 17         | 2.00E-17                                           | 6.50E-01                                           | 5.94E-01                                           | 2.16E-17   | 2.46E-01   | 1.28E-03        | 4.22E-06        |
| 18         | 3.42E-17                                           | 6.17E-01                                           | 5.56E-01                                           | 3.37E-17   | 3.25E-06   | 9.22E-04        | 5.53E-06        |
| 19         | 4.57E-17                                           | 5.77E-01                                           | 5.33E-01                                           | 5.50E-17   | 3.04E-06   | 6.56E-04        | 4.03E-06        |
| 20         | 4.60E-17                                           | 5.41E-01                                           | 5.13E-01                                           | 9.16E-17   | 3.38E-06   | 4.58E-04        | 3.22E-06        |
| 21         | 3.99E-17                                           | 5.04E-01                                           | 4.99E-01                                           | 1.36E-16   | 3.80E-06   | 3.11E-04        | 3.43E-06        |
| 22         | 7.91E-18                                           | 4.59E-01                                           | 4.99E-01                                           | 2.43E-16   | 2.94E-06   | 2.07E-04        | 5.06E-06        |
| 23         | 2.11E-19                                           | 3.90E-01                                           | 5.26E-01                                           | 3.63E-16   | 2.43E-06   | 1.37E-04        | 8.57E-06        |
| 24         | 5.89E-19                                           | 2.11E-01                                           | 6.67E-01                                           | 4.65E-16   | 4.50E-06   | 1.07E-04        | 1.66E-05        |

**Table S6** Relaxation fitting parameters from Least-Squares Fitting of  $\chi(\omega)$  data for **2**

| $T$<br>(K) | $\chi_{S,tot}$<br>( $\text{cm}^3\text{mol}^{-1}$ ) | $\Delta\chi_1$<br>( $\text{cm}^3\text{mol}^{-1}$ ) | $\Delta\chi_2$<br>( $\text{cm}^3\text{mol}^{-1}$ ) | $\alpha_1$ | $\alpha_2$ | $\tau_1$<br>(s) | $\tau_2$<br>(s) |
|------------|----------------------------------------------------|----------------------------------------------------|----------------------------------------------------|------------|------------|-----------------|-----------------|
| 5          | 7.47E-02                                           | 1.20E+00                                           | 2.44E+00                                           | 8.97E-02   | 1.46E-02   | 9.36E-03        | 3.14E-02        |
| 6          | 7.64E-02                                           | 1.45E+00                                           | 3.22E+00                                           | 4.10E-02   | 3.07E-02   | 5.02E-03        | 5.83E-02        |
| 7          | 6.15E-02                                           | 1.33E+00                                           | 2.44E+00                                           | 5.91E-02   | 3.28E-02   | 2.63E-03        | 3.47E-02        |
| 8          | 5.93E-02                                           | 9.13E-01                                           | 2.78E+00                                           | 1.29E-02   | 1.95E-01   | 1.21E-03        | 2.55E-02        |
| 9          | 5.75E-02                                           | 9.38E-01                                           | 2.01E+00                                           | 4.44E-02   | 1.21E-01   | 6.80E-04        | 1.31E-02        |
| 10         | 5.47E-02                                           | 9.45E-01                                           | 1.59E+00                                           | 9.93E-02   | 7.05E-02   | 3.74E-04        | 7.72E-03        |
| 11         | 7.37E-07                                           | 1.01E+00                                           | 1.30E+00                                           | 2.23E-01   | 3.60E-02   | 1.77E-04        | 4.85E-03        |
| 12         | 5.22E-07                                           | 9.62E-01                                           | 1.14E+00                                           | 3.36E-01   | 3.08E-02   | 7.48E-05        | 3.04E-03        |
| 13         | 6.80E-07                                           | 9.05E-01                                           | 1.04E+00                                           | 4.37E-01   | 2.98E-02   | 2.88E-05        | 1.94E-03        |
| 14         | 6.23E-07                                           | 7.87E-01                                           | 1.02E+00                                           | 4.08E-01   | 4.03E-02   | 1.09E-05        | 1.26E-03        |
| 15         | 1.44E-06                                           | 7.20E-01                                           | 9.47E-01                                           | 3.27E-01   | 3.50E-02   | 7.50E-06        | 8.51E-04        |
| 16         | 3.04E-06                                           | 6.81E-01                                           | 8.74E-01                                           | 2.45E-01   | 2.74E-02   | 7.05E-06        | 5.98E-04        |
| 17         | 7.08E-07                                           | 6.74E-01                                           | 7.84E-01                                           | 2.07E-01   | 1.33E-02   | 7.84E-06        | 4.38E-04        |
| 18         | 2.09E-06                                           | 6.33E-01                                           | 7.45E-01                                           | 2.84E-15   | 1.13E-02   | 8.66E-06        | 3.17E-04        |
| 19         | 2.75E-12                                           | 6.45E-01                                           | 6.59E-01                                           | 8.26E-15   | 3.56E-03   | 1.12E-05        | 2.42E-04        |
| 20         | 6.63E-12                                           | 6.75E-01                                           | 5.63E-01                                           | 2.02E-15   | 2.55E-08   | 1.36E-05        | 1.86E-04        |

(a)

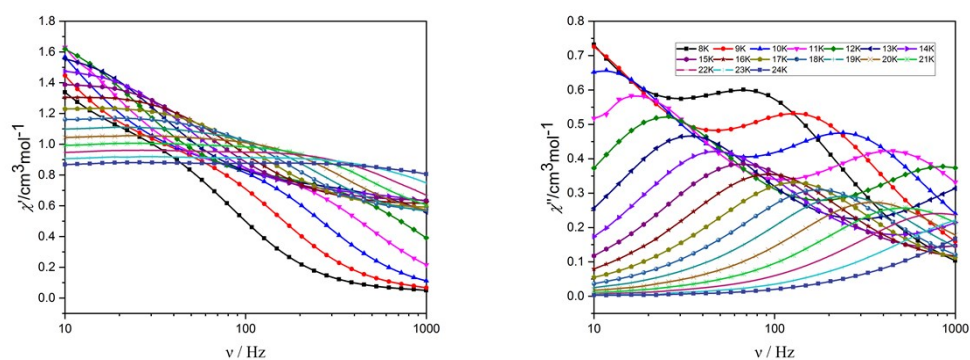

(b)

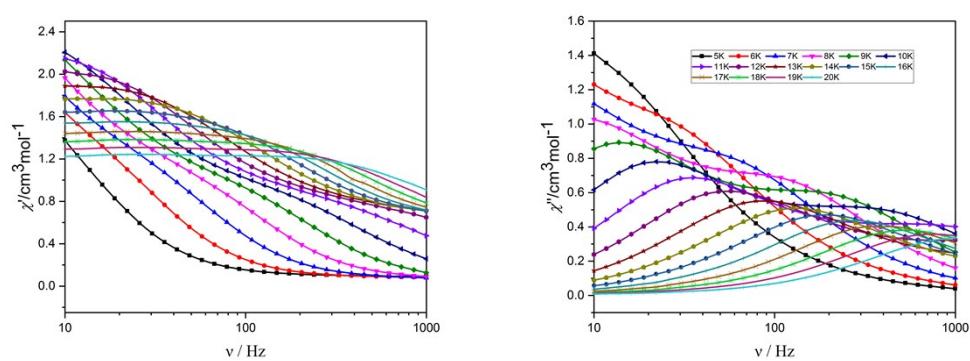

**Fig. S5** Frequency dependence of the in-phase ( $\chi'$ ) and out-of-phase ( $\chi''$ ) magnetic susceptibilities for complex **1** (a) in the range of 8 to 24 K and **2** (b) in the range of 5 to 20 K under zero *dc* field.

(a)

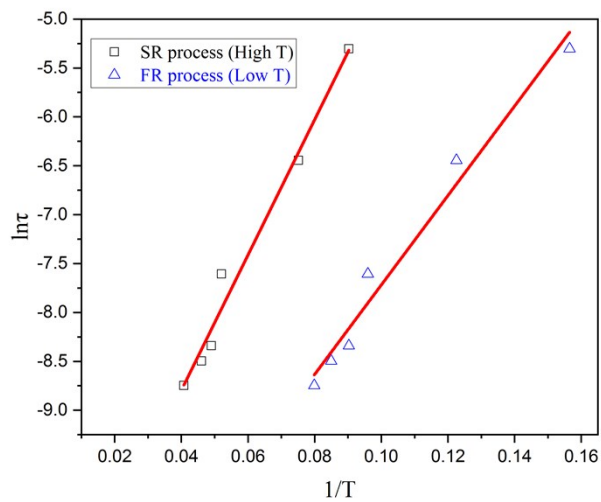

(b)

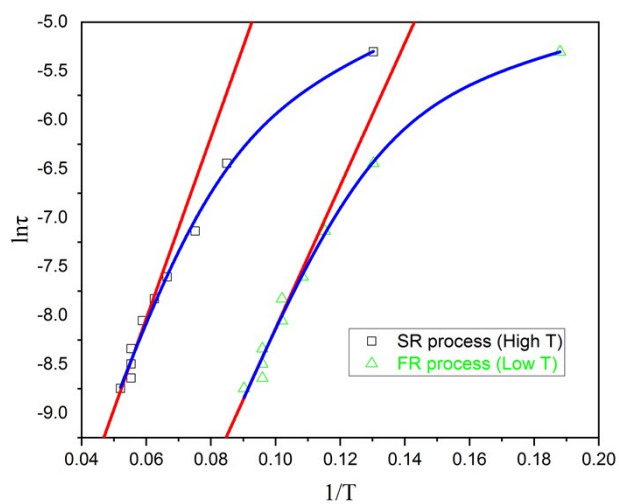

**Fig. S6**  $\ln\tau$  vs.  $T^{-1}$  plot for 1 (a) and 2 (b) for two relaxation processes; the red **solid** lines represent the least-squares fits of the experimental data to the Arrhenius law; the blue solid lines are nonlinear fit at low temperature.

**Table S7** Some examples of asymmetric dinuclear Dy<sup>III</sup> SMMs possessing two-step relaxation processes

| Complexes                                                                                                                      | Magnetic behavior | Magnetic Field/ Oe | Energy barrier/ (Low Temp.) | $\tau_0$ / s (Low Temp.) | Energy barrier/ K (High Temp.) | $\tau_0$ / s (High Temp.) |
|--------------------------------------------------------------------------------------------------------------------------------|-------------------|--------------------|-----------------------------|--------------------------|--------------------------------|---------------------------|
| [Dy <sub>2</sub> (ovph) <sub>2</sub> Cl <sub>2</sub> (MeOH) <sub>3</sub> ]·MeCN <sup>S1</sup>                                  | F                 | 0                  | 150                         | $2.3 \times 10^{-8}$     | 198                            | $7.3 \times 10^{-9}$      |
| [Dy <sub>2</sub> (HL) <sub>2</sub> Cl <sub>2</sub> (H <sub>2</sub> O) <sub>3</sub> ]·2H <sub>2</sub> O·MeCN <sup>S2</sup>      | F                 | 0                  | 103                         | $1.76 \times 10^{-8}$    | 204                            | $5.93 \times 10^{-9}$     |
| [Dy <sub>2</sub> (L) <sub>2</sub> (acac) <sub>2</sub> (H <sub>2</sub> O)]·2CH <sub>2</sub> Cl <sub>2</sub> <sup>S3</sup>       | F                 | 1500               | 33.5                        | $6.4 \times 10^{-7}$     | 68.6                           | $1.8 \times 10^{-7}$      |
| [Dy <sub>2</sub> (L) <sub>2</sub> (DBM) <sub>2</sub> (H <sub>2</sub> O)]·2CH <sub>2</sub> Cl <sub>2</sub> <sup>S3</sup>        | AF                | 1500               | 31.4                        | $6.6 \times 10^{-7}$     | 59.6                           | $7.3 \times 10^{-8}$      |
| [Dy <sub>2</sub> (Pc) <sub>2</sub> (L-OCH <sub>3</sub> ) <sub>2</sub> (H <sub>2</sub> O)]·2THF <sup>S4</sup>                   | F                 | 0                  | 32.5                        | $3.93 \times 10^{-7}$    | 59.5                           | $1.59 \times 10^{-7}$     |
| [{Dy(tmh) <sub>3</sub> } <sub>2</sub> ( $\mu_2$ -mbpymNO)]·MeOH <sup>S5</sup>                                                  | AF                | 1000               | 47.8                        | $1.5(4) \times 10^{-8}$  | 54.7                           | $1.7(3) \times 10^{-6}$   |
| [Dy <sub>2</sub> L <sub>2</sub> (HL)(NO <sub>3</sub> )(EtOH)]·0.5(C <sub>2</sub> H <sub>5</sub> OH) <sup>this work</sup>       | F                 | 0                  | 45.73                       | $4.6 \times 10^{-6}$     | 69.19                          | $9.5 \times 10^{-6}$      |
| [Dy <sub>2</sub> L <sub>2</sub> (NO <sub>3</sub> )(CH <sub>3</sub> COO) <sub>2</sub> ]·Et <sub>3</sub> NH <sup>this work</sup> | F                 | 0                  | 72.95                       | $2.0 \times 10^{-7}$     | 92.77                          | $1.2 \times 10^{-6}$      |

H-H<sub>2</sub>L = 2,2'-(2-hydroxy-3-methoxy-5-methylbenzylazanediy)diethanol; H<sub>2</sub>ovph = ortho-vanillin picolinyldiazone; H<sub>2</sub>-HL = 3-hydroxy-N'-(2-hydroxybenzylidene)picolino hydrazide; H<sub>2</sub>L = N,N'-bis(salicylidene)-o-phenylenediamine, acac = acetylacetonate, DBM = dibenzoylmethane; H<sub>2</sub>Pc = phthalocyanine, HL-OCH<sub>3</sub> = 2-hydroxy-3-methoxybenzaldehyde; tmh = 2,2,6,6-tetramethyl-3,5-heptanedionate, mbpymNO = 4-methylbipyrimidine. F = ferromagnetic, AF = antiferromagnetic.

## Computational details

Each binuclear complex has two types of Dy<sup>III</sup> fragments indicated as **1\_Dy1**, **1\_Dy2**, **2\_Dy1** and **2\_Dy2**. Complete-active-space self-consistent field (CASSCF) calculations on individual Dy<sup>III</sup> fragments (see Fig. S7 for the calculated structures of complexes **1** and **2**) on the basis of single-crystal X-ray determined geometry have been carried out with MOLCAS 8.4<sup>S6</sup> program package. Each individual Dy<sup>III</sup> fragment in **1** and **2** was calculated keeping the experimentally determined structure of the corresponding compound while replacing the other Dy<sup>III</sup> ion with diamagnetic Lu<sup>III</sup>.

The basis sets for all atoms are atomic natural orbitals from the MOLCAS ANO-RCC library: ANO-RCC-VTZP for Dy<sup>III</sup>; VTZ for close O and N; VDZ for distant atoms. The calculations employed the second order Douglas-Kroll-Hess Hamiltonian, where scalar relativistic contractions were taken into account in the basis set and the spin-orbit couplings were handled separately in the restricted active space state interaction (RASSI-SO) procedure. For individual Dy<sup>III</sup> fragment, active electrons in 7 active spaces include all *f* electrons (CAS(9 in 7 for Dy<sup>III</sup>)) in the CASSCF calculation. To exclude all the doubts, we calculated all the roots in the active space. We have mixed the maximum number of spin-free state which was possible with our hardware (all from 21 sextets, 128 from 224 quartets, 130 from 490 doublets for Dy<sup>III</sup>). SINGLE\_ANISO<sup>S7</sup> program was used to obtain the energy levels, *g* tensors, predominant *m<sub>J</sub>* values, magnetic axes, *et al.*, based on the above CASSCF/RASSI-SO calculations.

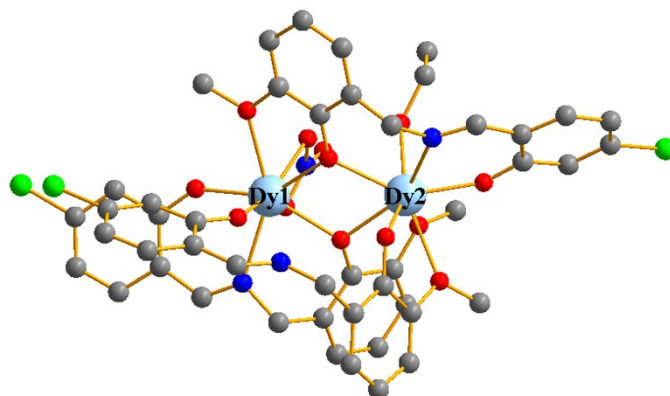

1

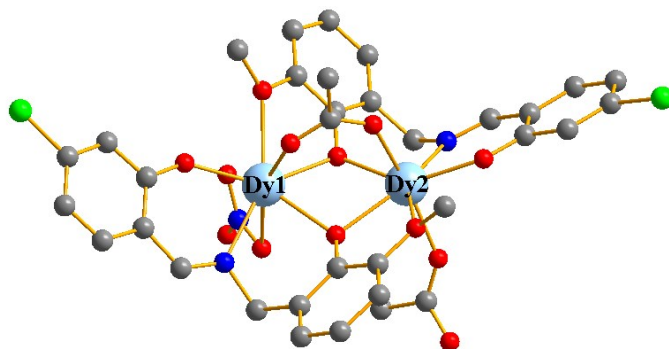

2

**Fig. S7** Calculated structures of Dy<sup>III</sup> fragments in **1** and **2**.

**Table S8** Calculated energy levels (cm<sup>-1</sup>), **g** ( $g_x$ ,  $g_y$ ,  $g_z$ ) tensors and predominant  $m_J$  values of the lowest eight Kramers doublets (KDs) of individual Dy<sup>III</sup> fragments for **1** and **2** using CASSCF/RASSI-SO with MOLCAS 8.4

| KDs | <b>1_Dy1</b>       |                          |            | <b>1_Dy2</b>       |                          |            |
|-----|--------------------|--------------------------|------------|--------------------|--------------------------|------------|
|     | $E/\text{cm}^{-1}$ | <b>g</b>                 | $m_J$      | $E/\text{cm}^{-1}$ | <b>g</b>                 | $m_J$      |
| 1   | 0.0                | 0.003<br>0.004<br>19.740 | $\pm 15/2$ | 0.0                | 0.012<br>0.016<br>19.703 | $\pm 15/2$ |
| 2   | 186.1              | 0.104<br>0.125<br>16.983 | $\pm 13/2$ | 123.6              | 0.071<br>0.092<br>17.222 | $\pm 13/2$ |
| 3   | 316.0              | 1.985<br>6.430<br>11.313 | $\pm 7/2$  | 235.6              | 0.517<br>0.671<br>14.331 | $\pm 11/2$ |
| 4   | 348.4              | 6.987<br>6.351<br>2.263  | $\pm 5/2$  | 329.5              | 3.383<br>4.169<br>10.344 | $\pm 9/2$  |
| 5   | 423.7              | 3.059<br>6.616<br>10.346 | $\pm 9/2$  | 429.7              | 3.526<br>5.095<br>10.931 | $\pm 5/2$  |
| 6   | 485.6              | 1.329<br>3.687<br>13.379 | $\pm 3/2$  | 572.0              | 8.523<br>6.123<br>3.097  | $\pm 3/2$  |
| 7   | 549.1              | 0.877<br>1.525<br>17.994 | $\pm 1/2$  | 618.3              | 9.798<br>6.323<br>2.286  | $\pm 7/2$  |
| 8   | 656.8              | 0.063<br>0.150<br>19.504 | $\pm 11/2$ | 665.7              | 0.469<br>2.072<br>17.725 | $\pm 1/2$  |
| KDs | <b>2_Dy1</b>       |                          |            | <b>2_Dy2</b>       |                          |            |
|     | $E/\text{cm}^{-1}$ | <b>g</b>                 | $m_J$      | $E/\text{cm}^{-1}$ | <b>g</b>                 | $m_J$      |



|   |       |                          |            |       |                          |            |
|---|-------|--------------------------|------------|-------|--------------------------|------------|
| 1 | 0.0   | 0.003<br>0.006<br>19.694 | $\pm 15/2$ | 0.0   | 0.040<br>0.047<br>19.630 | $\pm 15/2$ |
| 2 | 195.9 | 0.219<br>0.263<br>16.615 | $\pm 13/2$ | 91.1  | 0.212<br>0.270<br>19.347 | $\pm 5/2$  |
| 3 | 316.6 | 2.504<br>4.088<br>13.650 | $\pm 7/2$  | 180.9 | 0.582<br>0.961<br>16.329 | $\pm 13/2$ |
| 4 | 368.8 | 1.499<br>4.956<br>8.499  | $\pm 11/2$ | 264.7 | 2.667<br>3.593<br>14.045 | $\pm 11/2$ |
| 5 | 447.4 | 9.231<br>7.014<br>4.139  | $\pm 9/2$  | 345.5 | 8.755<br>7.069<br>2.337  | $\pm 9/2$  |
| 6 | 477.4 | 0.998<br>1.678<br>17.418 | $\pm 3/2$  | 441.7 | 2.249<br>3.177<br>14.223 | $\pm 1/2$  |
| 7 | 545.4 | 0.540<br>0.845<br>18.409 | $\pm 1/2$  | 574.3 | 0.978<br>1.716<br>16.156 | $\pm 3/2$  |
| 8 | 606.9 | 0.155<br>0.402<br>19.331 | $\pm 5/2$  | 610.7 | 0.528<br>2.885<br>17.254 | $\pm 7/2$  |

**Table S9** Wave functions with definite projection of the total moment  $|m_J\rangle$  for the lowest two KDs of individual Dy<sup>III</sup> fragments for **1** and **2** using CASSCF/RASSI-SO with MOLCAS 8.4

|              | $E/\text{cm}^{-1}$ | wave functions                                                                             |
|--------------|--------------------|--------------------------------------------------------------------------------------------|
| <b>1_Dy1</b> | 0.0                | 98% $ \pm 15/2\rangle$                                                                     |
|              | 186.1              | 90% $ \pm 13/2\rangle$                                                                     |
| <b>1_Dy2</b> | 0.0                | 98% $ \pm 15/2\rangle$                                                                     |
|              | 123.6              | 82% $ \pm 13/2\rangle$ +10% $ \pm 11/2\rangle$                                             |
| <b>2_Dy1</b> | 0.0                | 97% $ \pm 15/2\rangle$                                                                     |
|              | 195.9              | 92% $ \pm 13/2\rangle$                                                                     |
| <b>2_Dy2</b> | 0.0                | 97% $ \pm 15/2\rangle$                                                                     |
|              | 91.1               | 14% $ \pm 7/2\rangle$ +21% $ \pm 5/2\rangle$ +25% $ \pm 3/2\rangle$ +27% $ \pm 1/2\rangle$ |

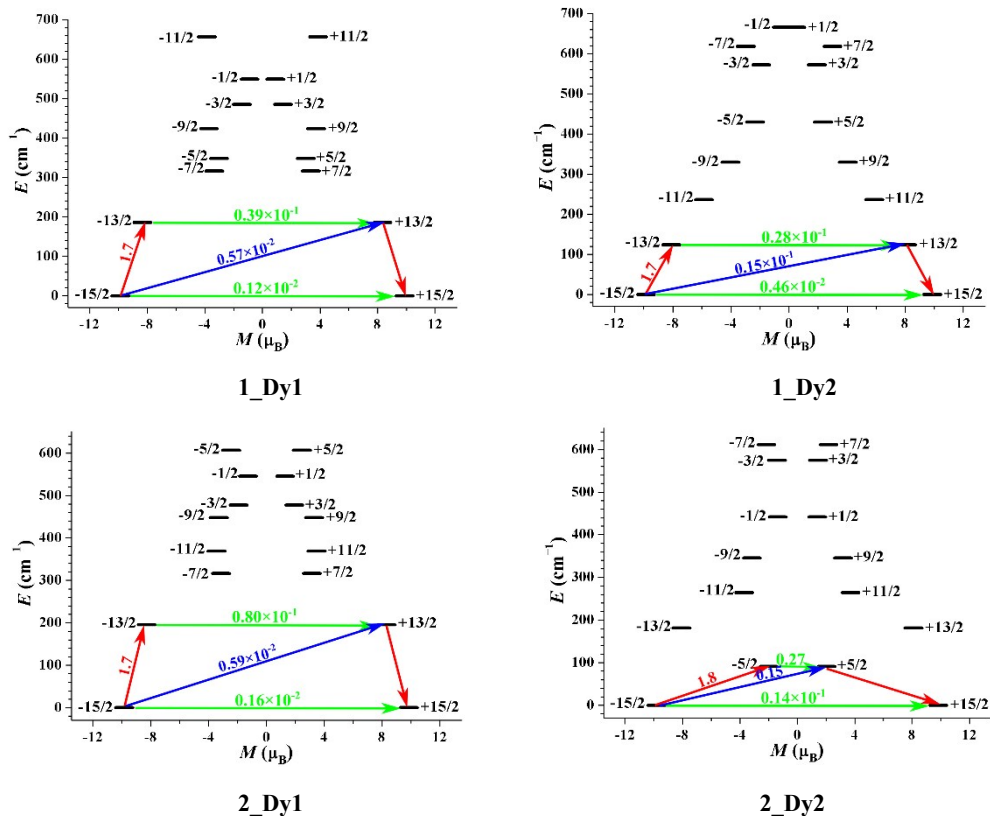

**Fig. S8** Magnetization blocking barriers for individual Dy<sup>III</sup> fragments in **1** and **2**. The thick black lines represent the KDs of the individual Dy<sup>III</sup> fragments as a function of their magnetic moment along the magnetic axis. The green lines correspond to diagonal matrix element of the transversal magnetic moment; the blue line represent Orbach relaxation processes. The path shown by the red arrows represents the most probable path for magnetic relaxation in the corresponding compounds. The numbers at each arrow stand for the mean absolute value of the corresponding matrix element of transition magnetic moment.

To fit the exchange interactions between Dy<sup>III</sup> ions in complexes **1** and **2**, we took two steps to obtain them. Firstly, we calculated individual Dy<sup>III</sup> fragment using CASSCF/RASSI-SO to obtain the corresponding magnetic properties. Then, the exchange interactions between the magnetic centers are considered within the Lines model,<sup>S8</sup> while the accounts of the dipole-dipole magnetic couplings are treated exactly. The Lines model is effective and has been successfully used widely in the research field of  $d$  and  $f$ -elements single-molecule magnets.<sup>S9</sup>

The Ising exchange Hamiltonians is:

$$H_{exch} = -JS_{Dy1}S_{Dy2} \quad (1)$$

The total  $J_{total}$  is the parameter of the total magnetic interaction ( $J_{total} = J_{dipolar} + J_{exchange}$ ) magnetic center ions. The  $S_{Dy} = 1/2$  is the ground pseudospin on the Dy<sup>III</sup> site. The dipolar magnetic coupling can be calculated exactly, while the exchange coupling constant was fitted through comparison of the computed and measured magnetic susceptibilities using the POLY\_ANISO program.<sup>S8</sup>

**Table S10** Exchange energies  $E$  (cm<sup>-1</sup>), the energy difference between each exchange doublets  $\Delta_t$  (cm<sup>-1</sup>) and the main values of the  $g_z$  for the lowest two exchange doublets of **1** and **2**

|   | <b>1</b> |                       |        | <b>2</b> |                       |        |
|---|----------|-----------------------|--------|----------|-----------------------|--------|
|   | $E$      | $\Delta_t$            | $g_z$  | $E$      | $\Delta_t$            | $g_z$  |
| 1 | 0.0      | $5.75 \times 10^{-8}$ | 38.215 | 0.0      | $1.11 \times 10^{-6}$ | 38.192 |
| 2 | 2.6      | $4.99 \times 10^{-7}$ | 9.780  | 1.9      | $3.48 \times 10^{-6}$ | 9.361  |

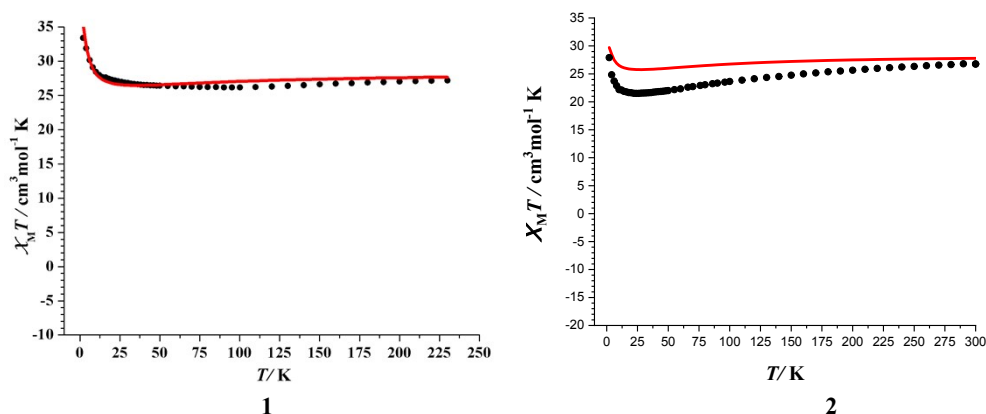

**Fig. S9** Calculated (red solid line) and experimental (black circle dot) data of magnetic susceptibilities of **1** and **2**. The intermolecular interactions  $zJ'$  of **1** and **2** were fitted to  $-0.01$  and  $-0.02$  cm<sup>-1</sup>, respectively.

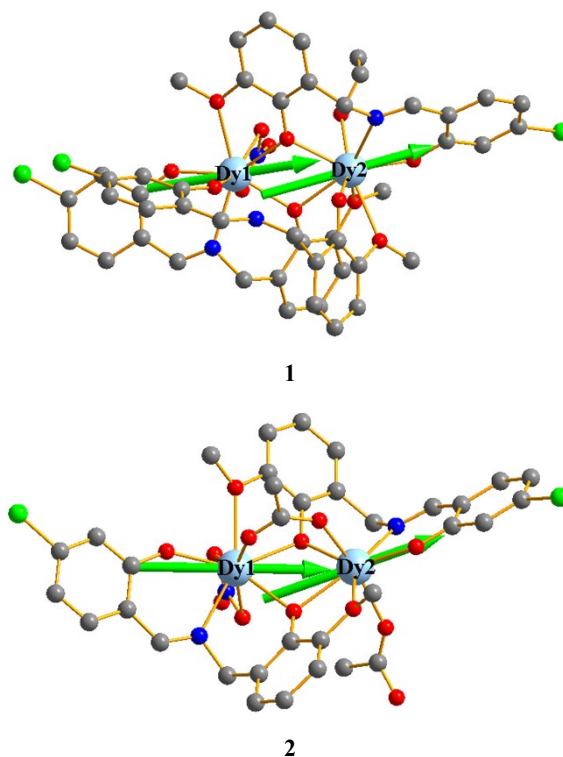

**Fig. S10** Calculated orientations of the local main magnetic axes on Dy<sup>III</sup> ions of complexes **1** and **2** in the ground KDs.

### References:

- S1 Y. N. Guo, G. F. Xu, W. Wernsdorfer, L. Ungur, Y. Guo, J. Tang, H. J. Zhang, L. F. Chibotaru, and A. K. Powell, *J. Am. Chem. Soc.*, 2011, **133**, 11948.
- S2 L. Zhang, J. Jung, P. Zhang, M. Guo, J. K. Tang and B. L. Guennic, *Chem. Eur. J.*, 2016, **22**, 1392.
- S3 W. Y. Zhang, P. Chen, Y. M. Tian, H. F. Li, W. B. Sun and P. F. Yan, *CrystEngComm*, 2018, **20**, 777.
- S4 J. Y. Ge, H. Y. Wang, J. Su, J. Li, B. L. Wang, Y. Q. Zhang and J. L. Zuo, *Inorg. Chem.*, 2018, **57**, 1408.
- S5 I. F. Díaz-Ortega, J. M. Herrera, D. Aravena, E. Ruiz, T. Gupta, G. Rajaraman, H. Nojiri and E. Colacio, *Inorg. Chem.*, 2018, **57**, 6362.
- S6 F. Aquilante, J. Autschbach, R. K. Carlson, L. F. Chibotaru, M. G. Delcey, L. De Vico, I. Fdez. Galván, N. Ferré, L. M. Frutos, L. Gagliardi, M. Garavelli, A. Giussani, C. E. Hoyer, G. Li Manni, H. Lischka, D. Ma, P. Å. Malmqvist, T.

- Müller, A. Nenov, M. Olivucci, T. B. Pedersen, D. Peng, F. Plasser, B. Pritchard, M. Reiher, I. Rivalta, I. Schapiro, J. Segarra - Martí, M. Stenrup, D. G. Truhlar, L. Ungur, A. Valentini, S. Vancoillie, V. Veryazov, V. P. Vysotskiy, O. Weingart, F. Zapata, R. Lindh, MOLCAS 8: New Capabilities for Multiconfigurational Quantum Chemical Calculations across the Periodic Table. *J. Comput. Chem.*, 2016, **37**, 506.
- S7 (a) Chibotaru, L. F.; Ungur, L.; Soncini, A. *Angew. Chem. Int. Ed.*, 2008, **47**, 4126.  
(b) Ungur, L.; Van den Heuvel, W.; Chibotaru, L. F. *New J. Chem.*, 2009, **33**, 1224.  
(c) Chibotaru, L. F.; Ungur, L.; Aronica, C.; Elmoll, H.; Pilet, G.; Luneau, D. *J. Am. Chem. Soc.*, 2008, **130**, 12445.
- S8 Lines, M. E. *J. Chem. Phys.*, 1971, **55**, 2977.
- S9 (a) Mondal, K. C.; Sundt, A.; Lan, Y. H.; Kostakis, G. E.; Waldmann, O.; Ungur, L.; Chibotaru, L. F.; Anson, C. E.; Powell, A. K. *Angew. Chem. Int. Ed.*, 2012, **51**, 7550. (b) Langley, S. K.; Wielechowski, D. P.; Vieru, V.; Chilton, N. F.; Moubaraki, B.; Abrahams, B. F.; Chibotaru, L. F.; Murray, K. S. *Angew. Chem. Int. Ed.*, 2013, **52**, 12014.
